# Supplementary material for: Different profiles of lipoprotein particles associate various degrees of cardiac involvement in adolescents with morbid obesity
Source: PubMed Central journal article supplement (PMC9723388; doi:10.3389/fped.2022.887771), 2022-11-22
Supplement: Datasheet1.pdf [file Datasheet1.pdf]

## SUPPLEMENTAL MATERIAL

**Table S1:** Echocardiographic data of cardiac involvement groups

| Variable                             | No cardiac disorder    | Mild cardiac changes   | Severe cardiac changes | P value    |              |                |
|--------------------------------------|------------------------|------------------------|------------------------|------------|--------------|----------------|
|                                      | (N=25)                 | (N=17)                 | (N=25)                 | No vs Mild | No vs Severe | Mild vs Severe |
| LV mass index (g/ht <sup>2.7</sup> ) | 30.7 [26.6-35.7]       | 46.3 [39.4-57.4]       | 48.1 [44.4-54.6]       | <0.001     | <0.001       | 0.434          |
| RWT                                  | 0.32 [0.30-0.36]       | 0.40 [0.34-0.45]       | 0.40 [0.35-0.43]       | <0.001     | <0.001       | 0.729          |
| LV remodeling (%)                    | 0                      | 88                     | 100                    | <0.001     | <0.001       | 0.158          |
| Systolic GLS (%)                     | -20.9 [-23.1 to -18.9] | -17.5 [-18.7 to -17.0] | -14.4 [-16.1 to -13.4] | 0.001      | <0.001       | <0.001         |
| Early diastolic GLSR (1/s)           | 3.1 [2.8-3.3]          | 2.3 [2.1-2.6]          | 2.0 [1.8-2.2]          | <0.001     | <0.001       | 0.012          |

Values expressed in median and 25-75% IQR; P value calculated by non-parametric Mann-Whitney U test; Dichotomous variables (Fisher exact test); LV, Left ventricle; RWT, Relative wall thickness; GLS, Global longitudinal strain; GLSR, Global longitudinal strain rate.

**Table S2:** Clinical and laboratory characteristics of subjects depending on metabolic syndrome (MS) diagnosis, considering only obese subjects.

| Variable                                    | No MS (<3 factors)<br>(N=28) | MS (≥3 factors)<br>(N=14) | P value |
|---------------------------------------------|------------------------------|---------------------------|---------|
| Age (years)                                 | 14 [13-15]                   | 14 [13-15]                | 0.906   |
| BMI (kg/m <sup>2</sup> )                    | 36.8 [33.9-38.6]             | 38.1 [35.9-43.0]          | 0.119   |
| BMI SD                                      | 7.3 [6.2-8.2]                | 7.9 [6.5-10.3]            | 0.348   |
| SBP (mmHg)                                  | 120 [117-128]                | 131 [126-144]             | 0.001   |
| DBP (mmHg)                                  | 70 [63-77]                   | 77 [69-80]                | 0.163   |
| <b>LABORATORY PARAMETERS</b>                |                              |                           |         |
| Fasting glucose (mg/dL)                     | 83 [72-89]                   | 84 [82-89]                | 0.238   |
| HbA1c (%) (N=32)                            | 5.3 [5.2-5.5]                | 5.4 [5.1-5.6]             | 0.833   |
| HOMA-IR                                     | 4.3 [3.5-6.5]                | 7.4 [4.2-8.9]             | 0.043   |
| <b>Classical lipid profile</b>              |                              |                           |         |
| Total Cholesterol (mg/dL)                   | 176 [154-195]                | 188 [164-207]             | 0.218   |
| LDL-C (mg/dL)                               | 108 [90-118]                 | 105 [95-121]              | 0.742   |
| HDL-C (mg/dL)                               | 44 [42-51]                   | 42 [36-47]                | 0.107   |
| Triglycerides (mg/dL)                       | 80 [66-111]                  | 124 [103-163]             | 0.002   |
| Remnant cholesterol (mg/dL)                 | 20.8 [15.3-27.3]             | 30.3 [25.2-44.4]          | 0.005   |
| <b>Inflammatory markers</b>                 |                              |                           |         |
| Highly sensitive C-reactive protein (mg/dL) | 0.19 [0.11-0.24]             | 0.37 [0.15-0.50]          | 0.133   |
| Glycoprotein A (μmol/L)                     | 759 [700-906]                | 868 [777-999]             | 0.054   |

**LIPOPROTEIN PARTICLES****VLDL-P (nmol/L)**

|        |                  |                  |       |
|--------|------------------|------------------|-------|
| Total  | 34.0 [28.5-53.8] | 59.6 [47.6-82.5] | 0.001 |
| Large  | 0.9 [0.8-1.5]    | 1.6 [1.3-1.8]    | 0.002 |
| Medium | 3.9 [2.3-5.4]    | 6.1 [4.5-9.4]    | 0.002 |
| Small  | 29.2 [25.4-45.1] | 52.2 [40.1-71.4] | 0.001 |

**LDL-P (nmol/L)**

|        |                       |                       |       |
|--------|-----------------------|-----------------------|-------|
| Total  | 1007.9 [960.3-1183.5] | 1092.5 [998.0-1256.9] | 0.518 |
| Large  | 165.1 [138.4-183.2]   | 161.1 [147.8-180.5]   | 0.664 |
| Medium | 327.5 [236.8-388.5]   | 347.7 [256.5-377.1]   | 0.823 |
| Small  | 608.1 [546.1-656.4]   | 644.2 [518.6-714.6]   | 0.321 |

**HDL-P (μmol/L)**

|        |                  |                  |       |
|--------|------------------|------------------|-------|
| Total  | 24.1 [21.7-26.4] | 23.5 [20.3-26.0] | 0.626 |
| Large  | 0.2 [0.2-0.2]    | 0.3 [0.2-0.3]    | 0.626 |
| Medium | 9.0 [8.2-9.5]    | 8.3 [7.5-9.5]    | 0.308 |
| Small  | 14.8 [12.9-17.0] | 14.6 [12.3-16.5] | 0.607 |

**Size (nm)**

|           |                  |                  |       |
|-----------|------------------|------------------|-------|
| VLDL size | 42.2 [41.9-42.3] | 42.2 [42.1-42.4] | 0.702 |
| LDL size  | 21.0 [20.8-21.1] | 20.9 [20.8-21.0] | 0.296 |
| HDL size  | 8.2 [8.2-8.3]    | 8.3 [8.3-8.3]    | 0.742 |

**Composition**

|                      |               |               |       |
|----------------------|---------------|---------------|-------|
| Ratio VLDL-TG/VLDL-C | 3.7 [3.5-4.0] | 4.0 [3.5-4.2] | 0.501 |
| Ratio IDL-TG/IDL-C   | 1.2 [1.0-1.3] | 1.1 [1.1-1.2] | 0.308 |

|                           |                       |                        |       |
|---------------------------|-----------------------|------------------------|-------|
| Ratio LDL-TG/LDL-C        | 0.1 [0.0-0.1]         | 0.1 [0.1-0.2]          | 0.085 |
| Ratio HDL-TG/HDL-C        | 0.2 [0.2-0.3]         | 0.4 [0.3-0.5]          | 0.002 |
| <b>Ratio LDL-P/HDL-P</b>  | 45.0 [37.6-51.2]      | 49.5 [43.3-52.8]       | 0.147 |
| <b>Non-HDL-P (nmol/L)</b> | 1127.0 [974.2-1122.4] | 1127.8 [1027.1-1317.5] | 0.296 |

---

Values expressed in median and 25-75% IQR; P value calculated by non-parametric Mann-Whitney U test; Dichotomous variables (Fisher exact test); BMI, Body Mass Index; SD, Standard deviation; SBP, Systolic blood pressure; DBP, Diastolic blood pressure; HOMA-IR, Homeostatic model assessment insulin resistance.

**Table S3:** Bivariate Correlations between lipoprotein particles and components of conventional lipid profile.

|                           | <b>Total Cholesterol</b> | <b>LDL-C</b> | <b>HDL-C</b> | <b>TG</b> | <b>Remnant cholesterol</b> |
|---------------------------|--------------------------|--------------|--------------|-----------|----------------------------|
| <b>VLDL-P (nmol/L)</b>    |                          |              |              |           |                            |
| Total                     | 0.43*                    | 0.16         | -0.29†       | 0.96*     | 0.95*                      |
| Large                     | 0.36*                    | 0.11         | -0.33*       | 0.91*     | 0.90*                      |
| Medium                    | 0.40*                    | 0.12         | -0.18        | 0.91*     | 0.89*                      |
| Small                     | 0.42*                    | 0.15         | -0.29†       | 0.95*     | 0.94*                      |
| <b>LDL-P (nmol/L)</b>     |                          |              |              |           |                            |
| Total                     | 0.87*                    | 0.96*        | 0.02         | 0.33*     | 0.36*                      |
| Large                     | 0.83*                    | 0.87*        | 0.17         | 0.28†     | 0.33*                      |
| Medium                    | 0.83*                    | 0.89*        | 0.06         | 0.35*     | 0.37*                      |
| Small                     | 0.61*                    | 0.71*        | -0.09        | 0.21      | 0.21                       |
| <b>HDL-P (μmol/L)</b>     |                          |              |              |           |                            |
| Total                     | 0.36*                    | 0.02         | 0.86*        | 0.14      | 0.11                       |
| Large                     | 0.49*                    | 0.19         | 0.04         | 0.49*     | 0.48*                      |
| Medium                    | 0.32*                    | -0.03        | 0.70*        | 0.06      | 0.03                       |
| Small                     | 0.31*                    | 0.05         | 0.75*        | 0.13      | 0.11                       |
| <b>Size (nm)</b>          |                          |              |              |           |                            |
| VLDL size                 | 0.05                     | -0.07        | 0.04         | 0.29†     | 0.29†                      |
| LDL size                  | 0.41*                    | 0.39*        | 0.25†        | 0.17      | 0.21                       |
| HDL size                  | -0.06                    | -0.04        | -0.31*       | -0.09     | -0.06                      |
| <b>Composition</b>        |                          |              |              |           |                            |
| Ratio VLDL-TG/VLDL-C      | -0.13                    | 0.36         | -0.13        | -0.04     | -0.19                      |
| Ratio IDL-TG/IDL-C        | -0.54*                   | -0.48*       | 0.17         | 0.45*     | -0.51*                     |
| Ratio LDL-TG/LDL-C        | 0.40*                    | 0.21         | -0.18        | 0.65*     | 0.64*                      |
| Ratio HDL-TG/HDL-C        | 0.23                     | -0.03        | -0.37*       | 0.88*     | 0.85*                      |
| <b>Ratio LDL-P/HDL-P</b>  | 0.37*                    | 0.66*        | -0.57*       | 0.18      | 0.22                       |
| <b>Non-HDL-P (nmol/L)</b> | 0.89*                    | 0.93*        | -0.01        | 0.42*     | 0.44*                      |

Spearman coefficient. Values expressed in r. \*p<0.001. †p<0.050. LDL, Low-density Lipoprotein; HDL, High-density Lipoprotein; TG, triglycerides.
